# Supplementary material
Source: MDPI journal article supplement (https://www.mdpi.com/2673-706X/3/4/20)
Supplement: s1 [file s1]

Archive with 1 entries (1 files):
- nanoenergyadv-2643572-supplementary.pdf
